# Supplementary material
Source: PubMed Central journal article supplement (PMC4761098)
Supplement: BPH-173-839-s001.pdf [file BPH-173-839-s001.pdf]

Supplementary figures and tables

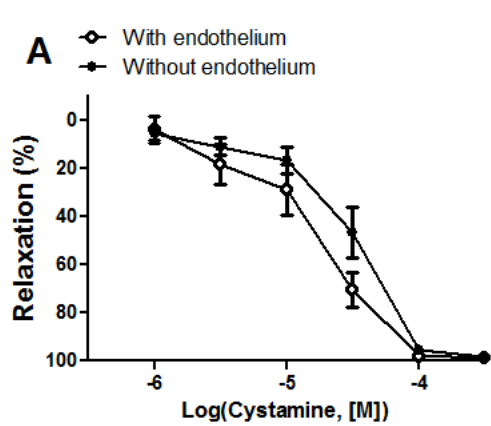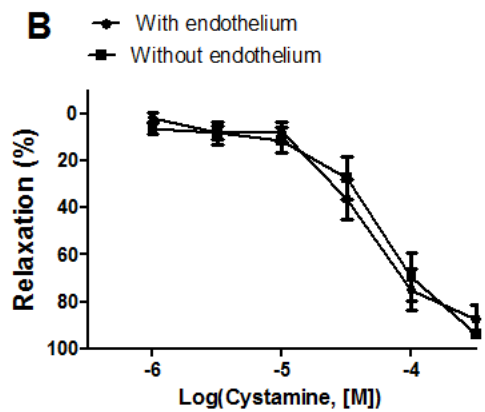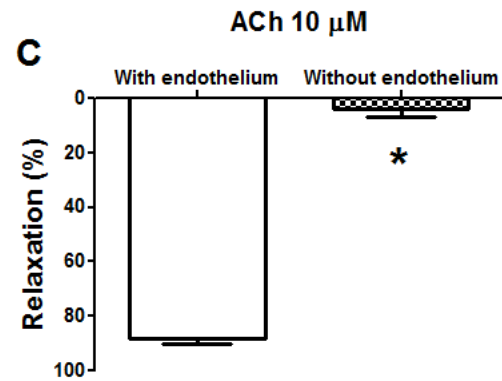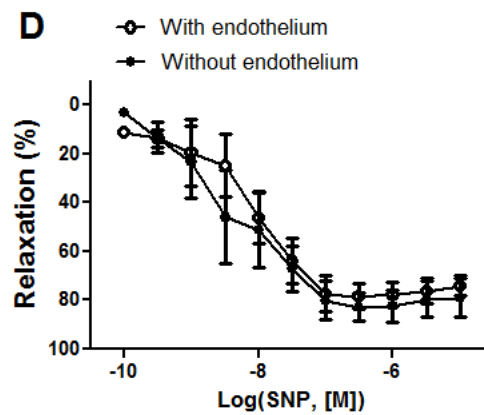

Suppl. Figure 1.

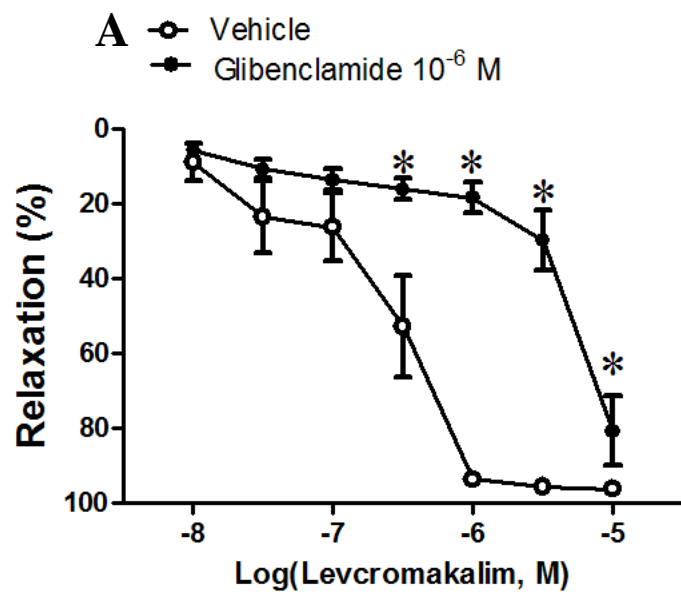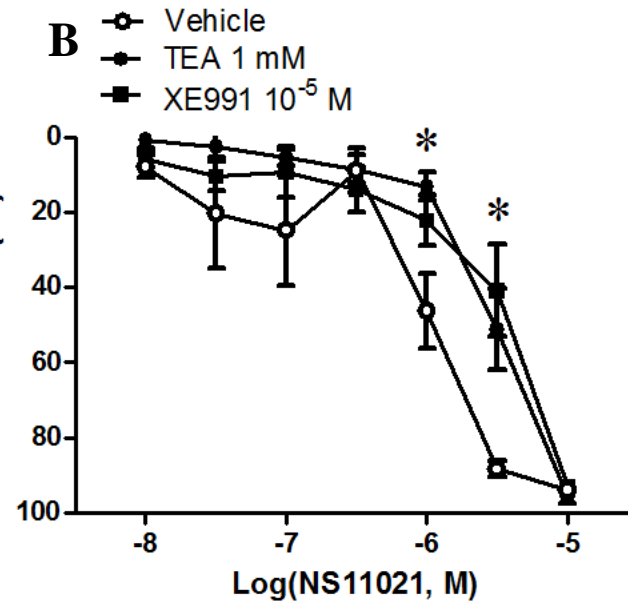

Suppl. Figure 2.

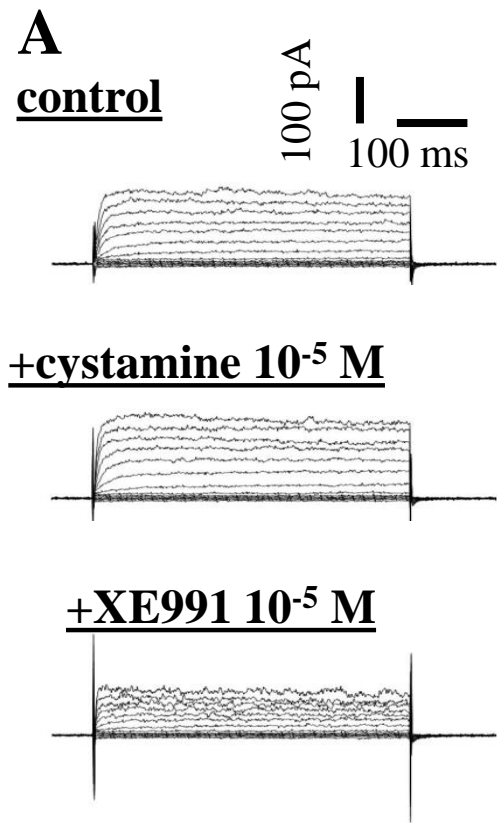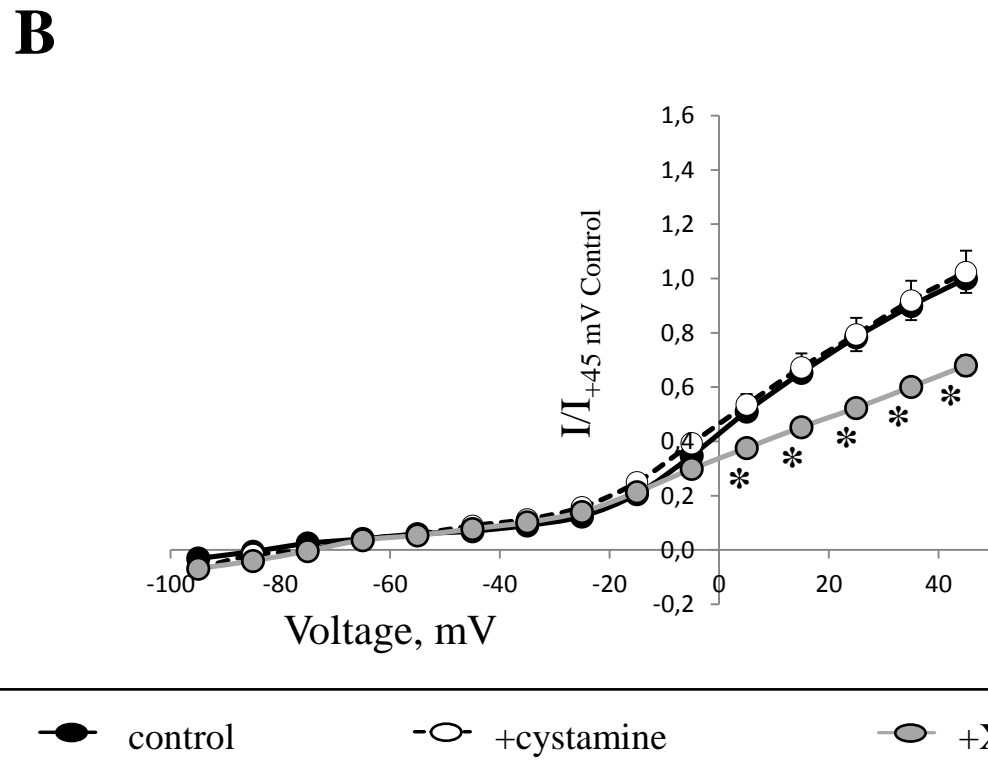

Suppl. Figure 3

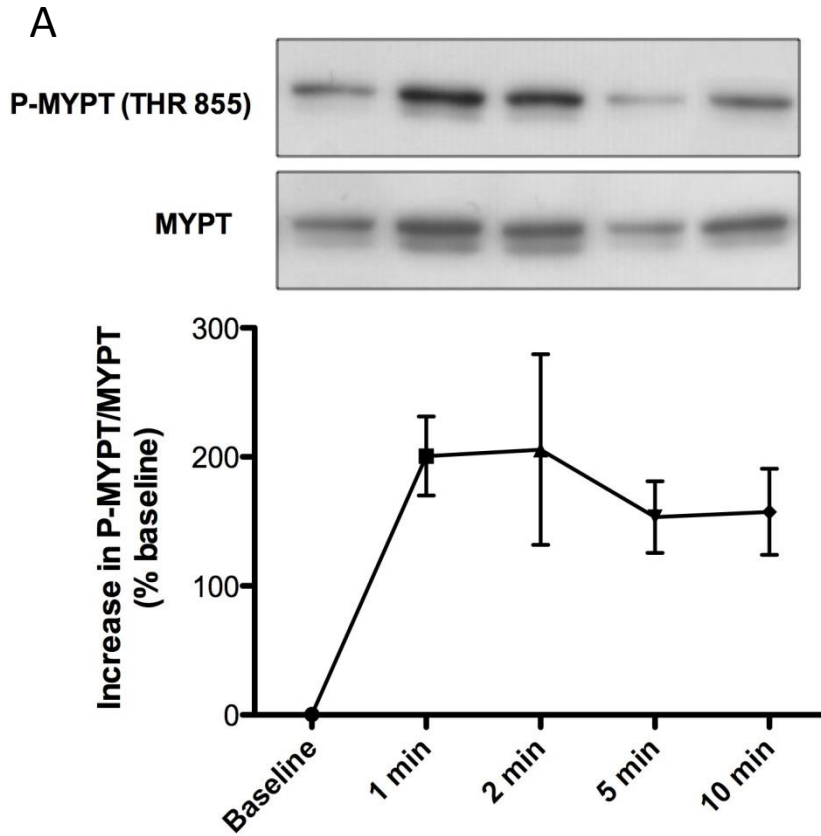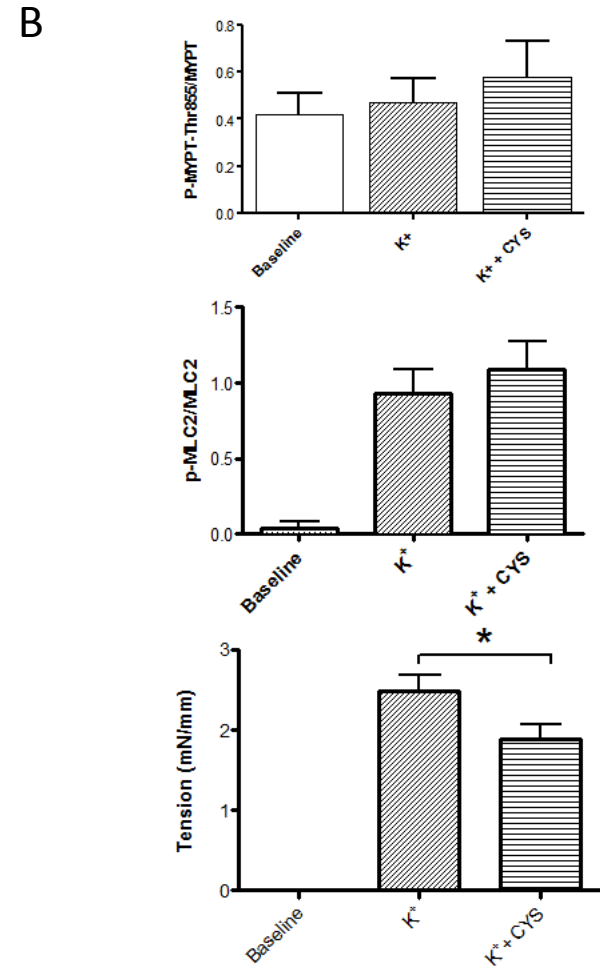

Suppl. Figure 4

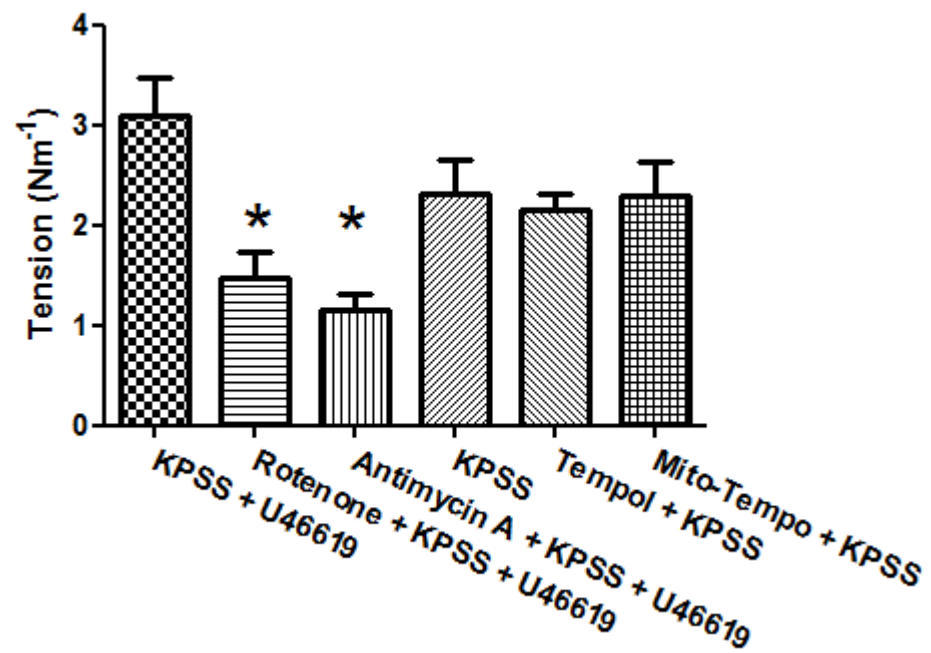

Suppl. Figure 5

**Supplementary table 1.** Primers used for detection of transglutaminases (*Tgm 1-7*)

| Gene        | Sense                         | Antisense                         | Bp  |
|-------------|-------------------------------|-----------------------------------|-----|
| <i>Tgm1</i> | 5'CTACCCGTA CTGTCA CCAACTTC'3 | 5'AATGGCTTTCTCTTCCACATACA'3       | 389 |
| <i>Tgm2</i> | 5'GAGCGGCATGGTCAACTGCAAT'3    | 5'GAGTGGTGACCAACTACA ACTCC'<br>3  | 571 |
| <i>Tgm3</i> | 5'CAGGAGAGAAGTCAAGGTGTGTT'3   | 5'CCAAAAGATGCATTAGGTTTGAGT<br>T'3 | 328 |
| <i>Tgm4</i> | 5'GAAAGGGAGAAGAATGTCCTCAT'3   | 5'GTACAGGAAACACAGGGTCGTAT'<br>3   | 537 |
| <i>Tgm5</i> | 5'ATCAGTTTTGACCGTCTTGTTGT'3   | 5'TTGGTAGATGAAGCCATAATCGT'3       | 435 |
| <i>Tgm6</i> | 5'AAAGGAGAGAAGCTCCTGGTAGA'3   | 5'TAATCACAAAGCCCTTGATGTCT'3       | 325 |
| <i>Tgm7</i> | 5'TAGTCTTCAGTCGACCTTCCAG'3    | 5'TTGAACACCTAAGCATCTCATT'3        | 756 |

## Suppl. Table 2

**Table 1: Effect of cystamine on responses of rat mesenteric small arteries to phenylephrine, serotonin, U46619 and high potassium**

| Agonist               | n | Control          |                 | Cystamine 10 <sup>-5</sup> M |                 | Cystamine 10 <sup>-4</sup> M |                 | Cystamine 10 <sup>-3</sup> M |                 |
|-----------------------|---|------------------|-----------------|------------------------------|-----------------|------------------------------|-----------------|------------------------------|-----------------|
|                       |   | E <sub>max</sub> | pD <sub>2</sub> | E <sub>max</sub>             | pD <sub>2</sub> | E <sub>max</sub>             | pD <sub>2</sub> | E <sub>max</sub>             | pD <sub>2</sub> |
| Phenylephrine (10 μM) | 6 | 3.90±0.36        | 5.66±0.07       | 3.66±0.40                    | 5.62±0.07       | 1.40±0.44*                   | ND              | 0.00±0.00                    | ND              |
| U46619 (0.5 μM)       | 5 | 4.04±0.59        | 7.06±0.12       | 3.47±0.30                    | 7.08±0.07       | 1.21±0.83                    | ND              | 0.03±0.08                    | ND              |
| 5-HT (3 μM)           | 5 | 3.32±1.16        | 6.04±0.22       | 2.99±1.06                    | 6.22±0.25       | 1.03±0.37                    | ND              | 0.03±0.01                    | ND              |
| KPSS (125 mM)         | 6 | 2.59±0.30        | 1.37±0.06       | 2.04±0.16                    | 1.33±0.04       | 1.83±0.15                    | 1.41±0.21       | 0.11±0.02                    | ND              |

Values are means ± SEM and are calculated from the data in figure 2. Brackets indicate maximal concentration of agonist for which value E<sub>max</sub> (Nm<sup>-1</sup>) was calculated. pD<sub>2</sub> shows negative logarithm of concentration giving half-maximal response. n: number of arteries studied. ND= not determined because Emax was less than 50%.



## Suppl. Table 3

Table 2: Level of contraction induced by phenylephrine (PhE, 10-100  $\mu\text{M}$ ) in the presence of different drug incubations.

|                | Drugs                            | n  | N  | PhE contraction ( $\text{Nm}^{-1}$ ) |
|----------------|----------------------------------|----|----|--------------------------------------|
| Figure 3       | Control                          | 32 | 8  | 3.59 $\pm$ 0.13                      |
|                | Cadaverine                       | 18 | 6  | 3.26 $\pm$ 0.16                      |
| Figure 4       | Control                          | 8  | 8  | 3.49 $\pm$ 0.12                      |
|                | U73121 (5 $\mu\text{M}$ )        | 7  | 7  | 2.00 $\pm$ 0.36                      |
|                | U73343 (10 $\mu\text{M}$ )       | 6  | 6  | 2.38 $\pm$ 0.11                      |
| Figure 7 (B,D) | Control                          | 7  | 7  | 3.58 $\pm$ 0.30                      |
|                | Glibenclamide (1 $\mu\text{M}$ ) | 7  | 7  | 3.66 $\pm$ 0.31                      |
|                | TEA (1 mM)                       | 7  | 7  | 3.30 $\pm$ 0.29                      |
|                | XE991 (10 $\mu\text{M}$ )        | 7  | 7  | 3.95 $\pm$ 0.34                      |
| Figure 7 (C,E) | Control                          | 11 | 11 | 2.89 $\pm$ 0.53                      |
|                | Linopirdine (10 $\mu\text{M}$ )  | 8  | 8  | 2.73 $\pm$ 0.35                      |
|                | 4-AP (100 $\mu\text{M}$ )        | 6  | 6  | 2.90 $\pm$ 0.18                      |

Values are means  $\pm$  SEM and are calculated from the data in figures indicated in the left column. n: number of arteries studied. N: number of animals used.
